# Supplementary material for: Disruption of the GABAergic system contributes to the development of perioperative neurocognitive disorders after anesthesia and surgery in aged mice
Source: PubMed Central journal article supplement (PMC7415208; doi:10.1111/cns.13388), 2020-06-02
Supplement: CNS-26-913-s002.pdf [file CNS-26-913-s002.pdf]

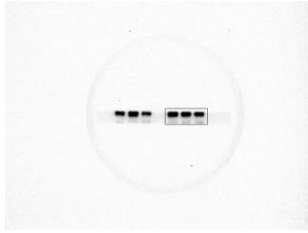

GAT-3 Full unedited blot for Figure3G

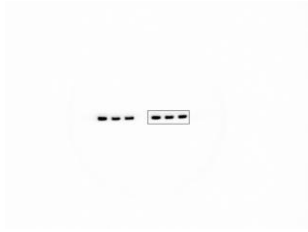

GAPDH Full unedited blot for Figure3G

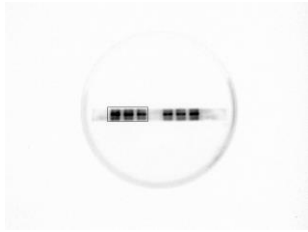

GAD65 Full unedited blot for Figure3H

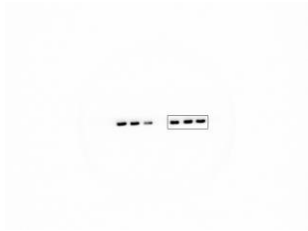

GAPDH Full unedited blot for Figure3H

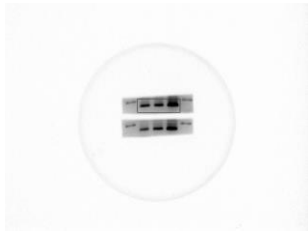

Surface  $\alpha$ 5GABA<sub>A</sub>Rs Full unedited blot for Figure3I

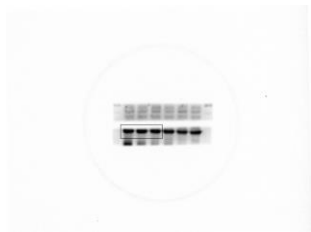

NKA Full unedited blot for Figure3I

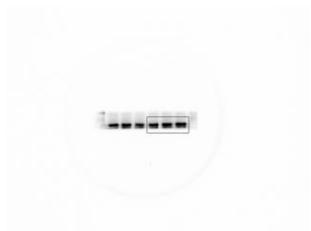

p-ERK1/2 Full unedited blot for Figure5A

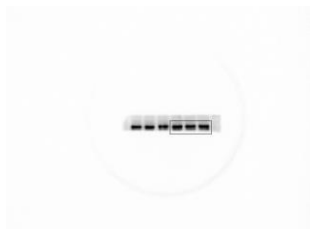

ERK1/2 Full unedited blot for Figure5A

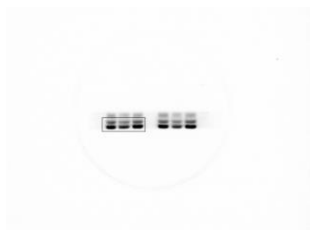

p-JNK1/2 Full unedited blot for Figure5B

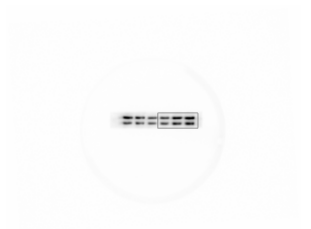

JNK1/2 Full unedited blot for Figure5B

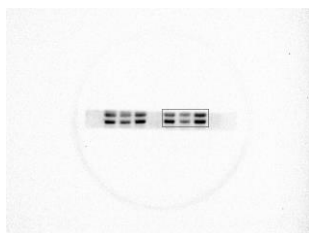

p-P38 Full unedited blot for Figure5C

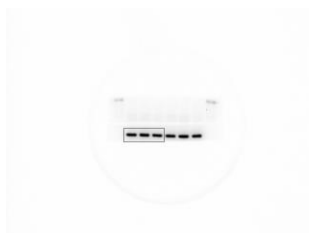

P38 Full unedited blot for Figure5C

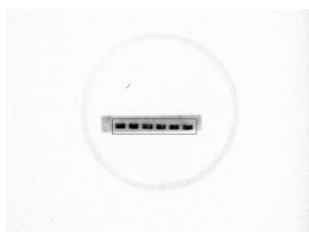

p-ERK1/2 Full unedited blot for Figure6G

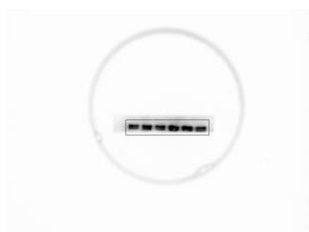

ERK1/2 Full unedited blot for Figure6G

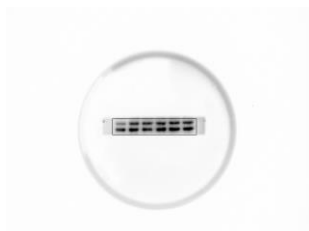

p-JNK1/2 Full unedited blot for Figure6H

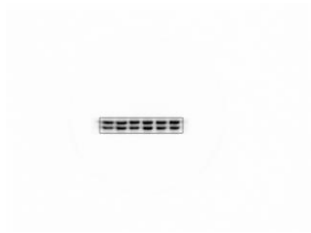

JNK1/2 Full unedited blot for Figure6H

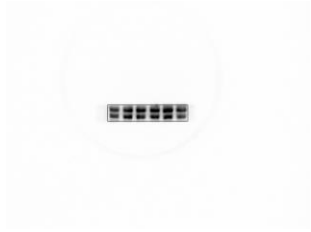

p-P38 Full unedited blot for Figure6I

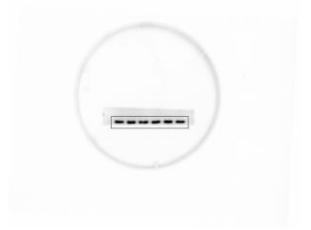

P38 Full unedited blot for Figure6I

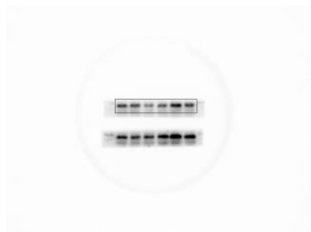

Surface  $\alpha 5$ GABA<sub>A</sub>Rs Full unedited blot for Figure6J

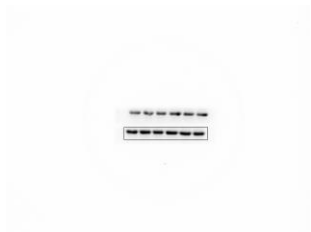

NKA Full unedited blot for Figure6J
